# Supplementary material for: Investigating bacteriophages as a novel multiple-hurdle measure against Campylobacter: field trials in commercial broiler plants
Source: PubMed Central journal article supplement (PMC10850366; doi:10.1038/s41598-024-53365-w), 2024-02-07
Supplement: 41598_2024_53365_MOESM1_ESM.pdf [file 41598_2024_53365_MOESM1_ESM.pdf]

# Supplementary Information

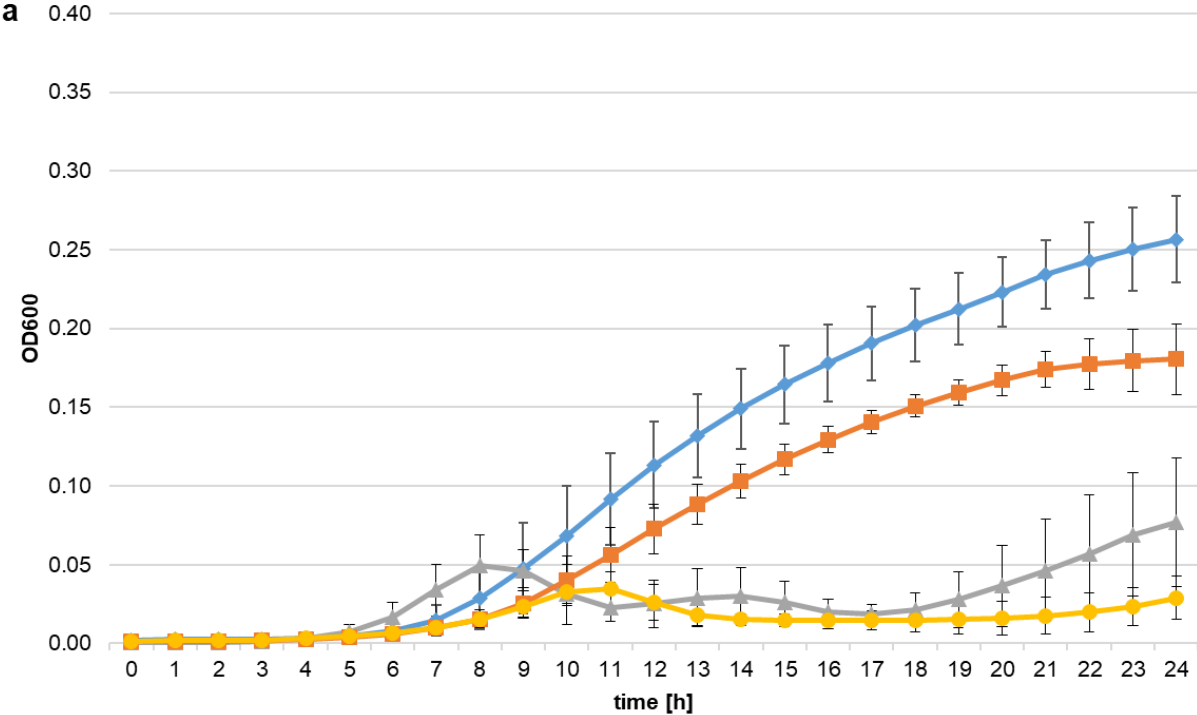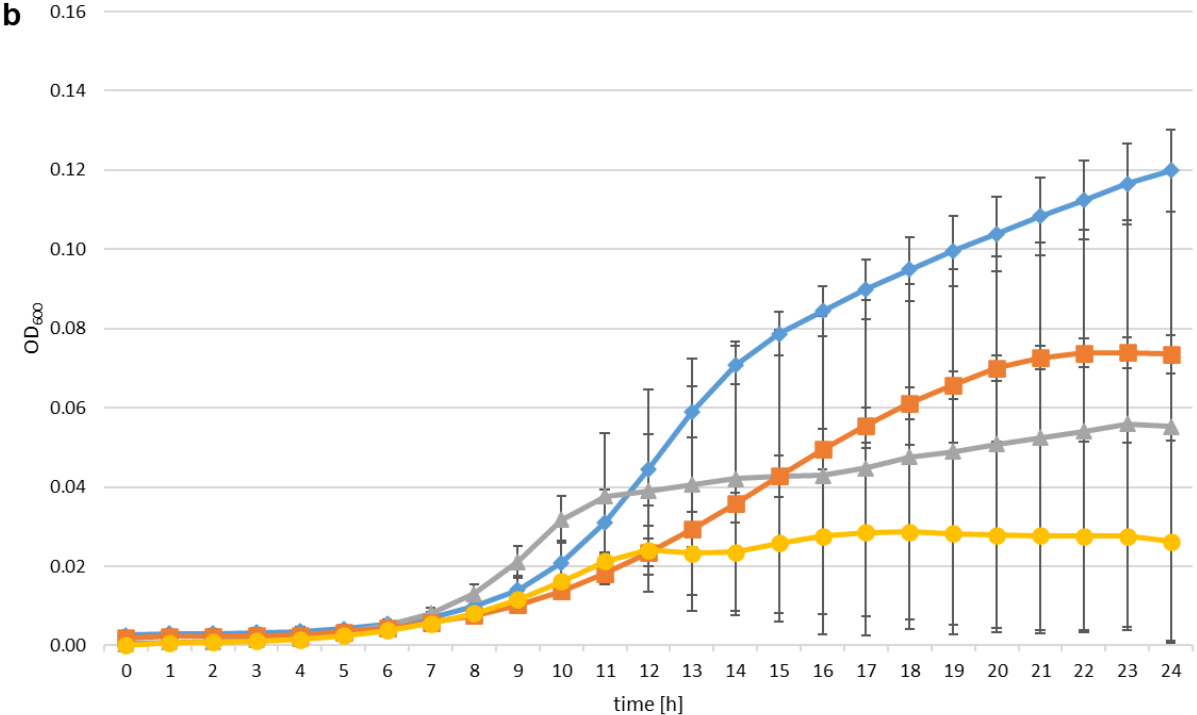

**Supplementary Figure S1.** Growth behavior of field isolates *C. coli* Cc7 (a) and *C. jejuni* Cj18 (b) in broth without added organic acids and phages (—◆—) and in broth supplemented with an organic acid blend (—■—) (benzoic acid, sorbic acid, propionic acid and acetic acid) and a phage mixture (—▲—) consisting of NCTC 12673 and phage vB\_CcM-LmqcCPL1/1 (Multiplicity of infection (MOI) of 0.001 for Cj18, MOI of 0.01 for Cc7), and a combination of organic acid blend and phage mixture (—●—). Bacterial growth was monitored hourly by optical density (OD) absorbance measurements at 600 nm (OD<sub>600</sub>) in a Tecan Spark<sup>®</sup> Plate Reader.

**Supplementary Table 1.** Study design of field trial design 1 with information on the stables, fattening period, breeding line, day of positive sampling, and biosecurity measures as well as vaccinations, feed additives, and medications.

| Field trial design 1                                           |                                         |                                       |                                  |                                     |                                     |
|----------------------------------------------------------------|-----------------------------------------|---------------------------------------|----------------------------------|-------------------------------------|-------------------------------------|
|                                                                | Control group PAC                       | Experimental group (PAC) <sup>a</sup> | Control group A/P                | Experimental group (P) <sup>b</sup> | Experimental group (A) <sup>c</sup> |
| Flock size before thinning<br>before final slaughter           | 26,000<br>19,646                        | 27,000<br>16,200                      | 30,500<br>18,792                 | 34,300<br>20,200                    | 30,800<br>23,807                    |
| Fattening period (days)                                        | 42                                      | 42                                    | 42                               | 42                                  | 42                                  |
| Breed                                                          | Ross 308                                |                                       |                                  |                                     |                                     |
| Positive PCR result for <i>Campylobacter</i> spp. <sup>d</sup> | 26 dph                                  | 26 dph                                | 30 dph                           | 30 dph                              | 30 dph                              |
| Biosecurity                                                    |                                         |                                       |                                  |                                     |                                     |
| Building                                                       | separate                                | separate                              | separate                         | separate                            | separate                            |
| Change of boots                                                | yes                                     | yes                                   | yes                              | yes                                 | yes                                 |
| Change of clothes                                              | no                                      | yes                                   | no                               | yes                                 | no                                  |
| Vaccination <sup>e</sup>                                       | IBDV, NDV, IBV                          |                                       |                                  |                                     |                                     |
| Feed additives                                                 | Minerals, Vit. A, D <sub>3</sub> , E    |                                       |                                  |                                     |                                     |
| Early antibiotic therapy                                       | Lincomycin, Spectinomycin 1 dph - 3 dph |                                       |                                  |                                     |                                     |
| Antibiotic therapy (additional)                                | Colistin sulfate<br>35 dph -<br>37 dph  |                                       | Penicillin<br>30 dph -<br>32 dph | Penicillin<br>27 dph - 29<br>dph    |                                     |

<sup>a</sup>PAC = phages, organic acids, curcumin

<sup>b</sup>P = phages

<sup>c</sup>A = organic acids

<sup>d</sup>dph = days post hatch

<sup>e</sup>IBDV = infectious bursal disease virus, NDV = Newcastle disease virus, IBV = infectious bronchitis virus.

**Supplementary Table 2.** Study design of field trial design 2 with information on the stables, fattening period, breeding line, day of positive sampling, and biosecurity measures as well as vaccinations, feed additives, and medications.

| Field trial design 2                                           |                                            |                                     |
|----------------------------------------------------------------|--------------------------------------------|-------------------------------------|
|                                                                | Control group                              | Experimental group (C) <sup>a</sup> |
| Farm                                                           | 1                                          | 1                                   |
| Flock size (before thinning)                                   | 27,000                                     | 30,000                              |
| Fattening period (days)                                        | 41                                         | 41                                  |
| Breed                                                          | Ross 308                                   |                                     |
| Positive PCR result for <i>Campylobacter</i> spp. <sup>b</sup> | 25 dph                                     | 25 dph                              |
| Biosecurity                                                    |                                            |                                     |
| Buildings of stables                                           | different                                  | different                           |
| Change of rubber boots                                         | yes                                        | yes                                 |
| Change of clothes                                              | no                                         | no                                  |
| Vaccination <sup>c</sup>                                       | IBDV, NDV, IBV                             |                                     |
| Feed additives                                                 | Minerals, Vit. A, D <sub>3</sub> , E       |                                     |
| Early antibiotic therapy                                       | Lincomycin, Spectinomycin<br>1 dph - 3 dph |                                     |

<sup>a</sup>C = curcumin

<sup>b</sup>dph = days post hatch

<sup>c</sup>IBDV = infectious bursal disease virus, NDV = newcastle disease virus, IBV = infectious bronchitis virus.

**Supplementary Table 3.** Timeline of application of organic acid blend and phage mixture in field trial design 1 and associated sampling.

| Field trial design 1 |                   |                                       |   |   |                   |                                     |                                     |                                |
|----------------------|-------------------|---------------------------------------|---|---|-------------------|-------------------------------------|-------------------------------------|--------------------------------|
| Days post hatch      | Control group PAC | Experimental group (PAC) <sup>a</sup> |   |   | Control group A/P | Experimental group (P) <sup>b</sup> | Experimental group (A) <sup>c</sup> | Sample collection <sup>d</sup> |
| 25                   |                   |                                       |   |   |                   |                                     |                                     |                                |
| 26                   |                   |                                       |   |   |                   |                                     |                                     |                                |
| 27                   |                   |                                       |   |   |                   |                                     |                                     |                                |
| 28                   |                   |                                       |   |   |                   |                                     |                                     |                                |
| 29                   |                   |                                       |   |   |                   |                                     |                                     |                                |
| 30                   |                   |                                       |   |   |                   |                                     |                                     |                                |
| 31                   |                   |                                       |   | A |                   |                                     | A                                   | FS                             |
| 32                   |                   |                                       |   | A |                   |                                     | A                                   |                                |
| 33                   |                   | P                                     | C |   |                   | P                                   |                                     | FS, WS                         |
| 34                   |                   |                                       | C | A |                   |                                     | A                                   | FS, WS                         |
| 35                   |                   |                                       | C | A |                   |                                     | A                                   | CS                             |
| 36                   |                   |                                       | C | A |                   |                                     | A                                   |                                |
| 37                   |                   |                                       | C | A |                   |                                     | A                                   |                                |
| 38                   |                   |                                       | C | A |                   |                                     | A                                   | FS                             |
| 39                   |                   |                                       | C | A |                   |                                     | A                                   |                                |
| 40                   |                   | P                                     | C |   |                   | P                                   |                                     | FS, WS                         |
| 41                   |                   |                                       | C |   |                   |                                     |                                     | FS, WS                         |
| 42                   |                   |                                       |   |   |                   |                                     |                                     | CS                             |

<sup>a</sup>PAC = phages, organic acids, curcumin

<sup>b</sup>P = phages

<sup>c</sup>A = organic acids

<sup>d</sup>FS = fecal samples, CS = cecal samples, WS = water samples.

**Supplementary Table 4.** Timeline of curcumin application in field trial design 2 and associated sampling.

| Field trial design 2 |               |                                     |                                |
|----------------------|---------------|-------------------------------------|--------------------------------|
| Days post hatch      | Control group | Experimental group (C) <sup>a</sup> | Sample collection <sup>b</sup> |
| 25                   |               |                                     |                                |
| 26                   |               |                                     | FS                             |
| 27                   |               |                                     |                                |
| 28                   |               |                                     |                                |
| 29                   |               | C                                   | FS                             |
| 30                   |               | C                                   | CS                             |
| 31                   |               | C                                   |                                |
| 32                   |               | C                                   |                                |
| 33                   |               | C                                   | FS                             |
| 34                   |               | C                                   |                                |
| 35                   |               | C                                   |                                |
| 36                   |               | C                                   |                                |
| 37                   |               | C                                   | FS                             |
| 38                   |               | C                                   |                                |
| 39                   |               | C                                   |                                |
| 40                   |               | C                                   | FS                             |
| 41                   |               |                                     | CS                             |

<sup>a</sup>C = curcumin

<sup>b</sup>FS = fecal samples, cs = cecal samples.
